# Supplementary material for: CO2-triggered fluorescence “turn-on” response of perylene diimide-containing poly(N,N-dimethylaminoethyl methacrylate)
Source: Royal Society of Chemistry journal article supplement (doi:10.1039/c2ta00482h), 2012-11-23
Supplement: c2ta00482h.pdf [file c2ta00482h.pdf]

*Electronic Supplementary Information*

**CO<sub>2</sub>-Triggered Fluorescence “Turn-on” Response of  
Perylene Diimide-Containing Poly(*N,N*-dimethylaminoethyl methacrylate)**

Li Qun Xu<sup>1</sup>, Bin Zhang<sup>1</sup>, Ming Sun<sup>1</sup>, Liang Hong<sup>1</sup>, Koon-Gee Neoh<sup>1</sup>, En-Tang Kang<sup>1\*</sup>, Guo  
Dong Fu<sup>2</sup>

<sup>1</sup> Department of Chemical & Biomolecular Engineering  
National University of Singapore  
Kent Ridge, Singapore 119260

<sup>2</sup> School of Chemistry and Chemical Engineering  
Southeast University  
Jiangning District, Nanjing, Jiangsu Province, P.R. China 211189

\* To whom correspondence should be addressed:  
E-mail: [cheket@nus.edu.sg](mailto:cheket@nus.edu.sg)

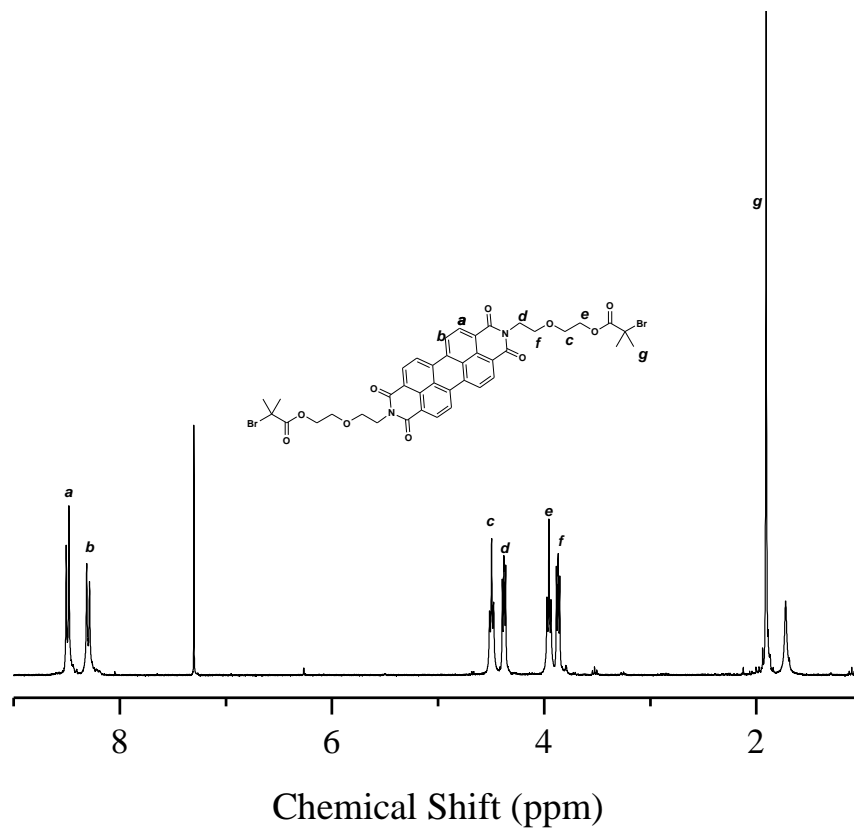

**Fig. S1.** <sup>1</sup>H NMR spectrum of PBI-Br in CDCl<sub>3</sub>.

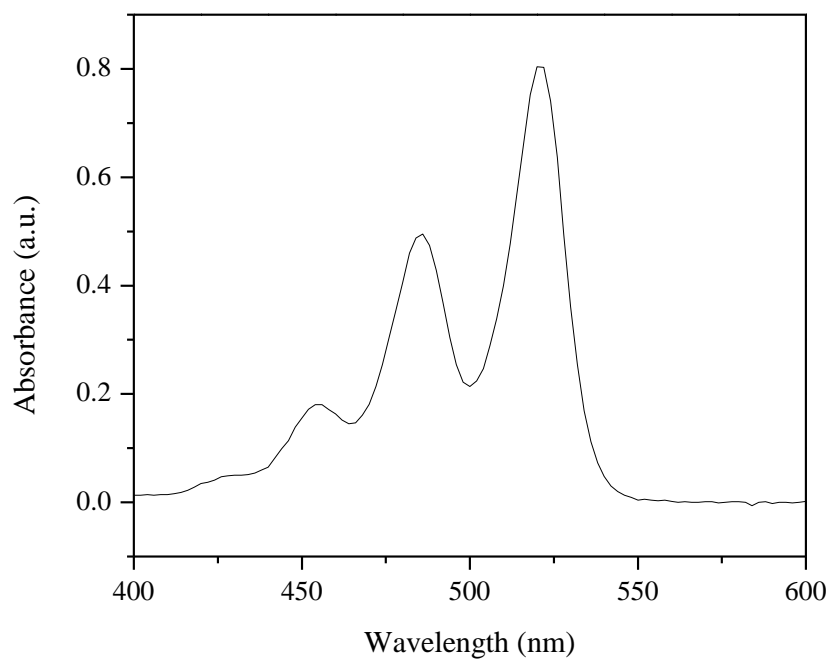

**Fig. S2.** UV-visible absorption spectrum of PBI-Br in THF with a concentration of  $1.2 \times 10^{-5}$  mol/L.

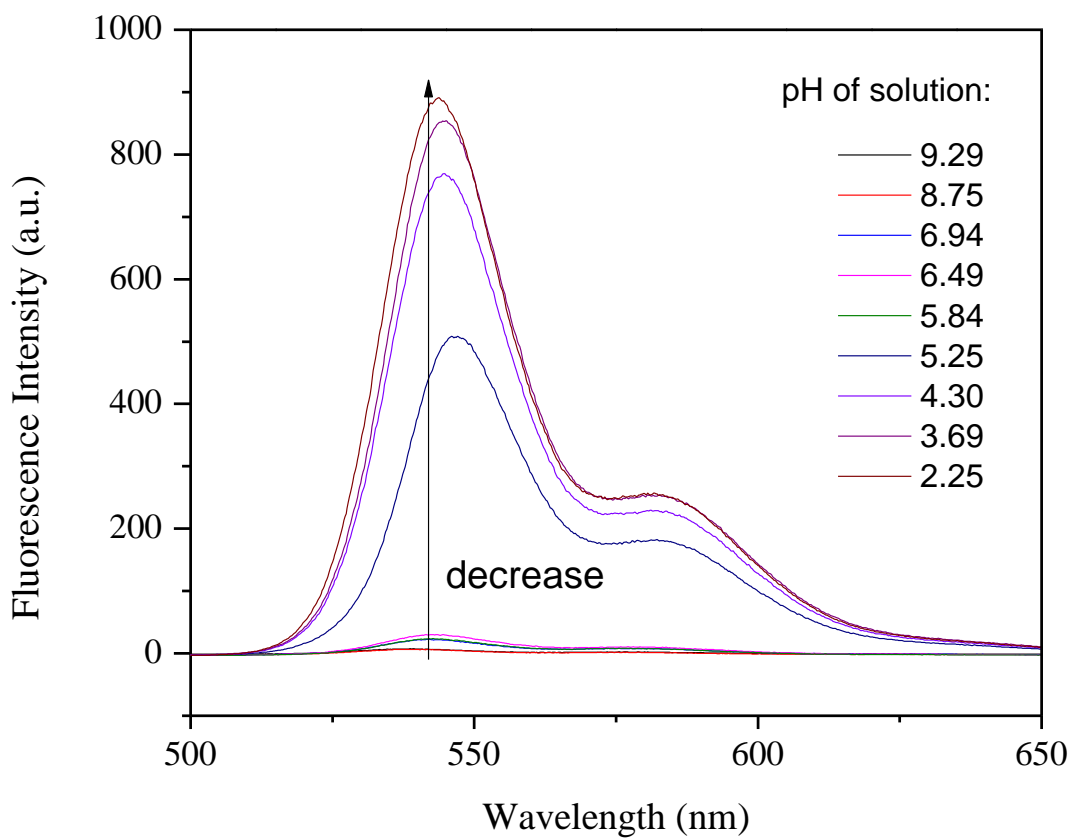

**Fig. S3.** pH dependent fluorescence spectra of **P2** aqueous solution at an excitation wavelength of 494 nm.

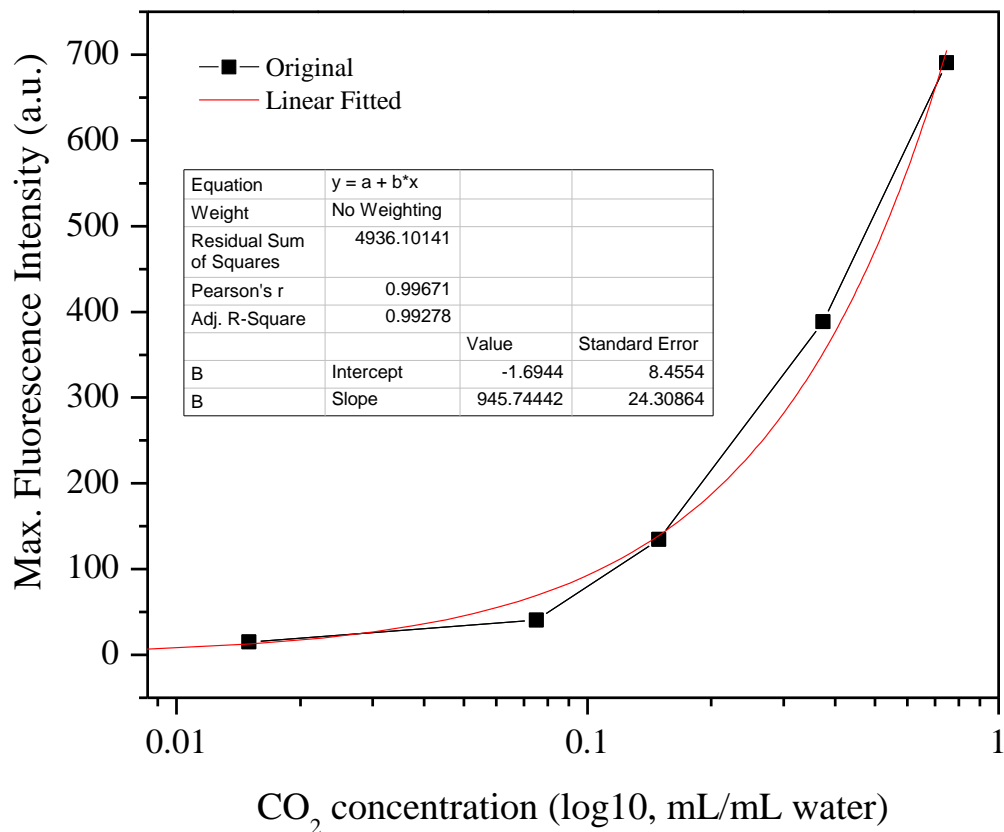

**Fig. S4.** The plot and fitted calibration curve of dissolved CO<sub>2</sub> concentrations versus fluorescence emission intensity of **P2** at 547 nm.
